# Supplementary material for: LC-ESI-MS/MS Polyphenolic Profile and In Vitro Study of Cosmetic Potential of Aerva lanata (L.) Juss. Herb Extracts
Source: MDPI journal article supplement (doi:10.3390/molecules27041259), 2022-02-13
Supplement: s1 [file s1]

# Supplementary Materials

## LC-ESI-MS/MS polyphenolic profile and *in vitro* study of cosmetic potential of *Aerva lanata* (L.) Juss. herb extracts

Aleksandra Pieczykolan<sup>1</sup>, Wioleta Pietrzak<sup>1</sup>, Katarzyna Dos Santos Szewczyk<sup>1</sup>, Urszula Gawlik-Dziki<sup>2</sup> and Renata Nowak<sup>1,\*</sup>

<sup>1</sup>Department of Pharmaceutical Botany, Medical University, 1 Chodźki Street, 20-093 Lublin, Poland; aleksandraoleszek@umlub.pl (A.P.); wioleta.pietrzak@umlub.pl (W.P.); k.szewczyk@umlub.pl (K.D.S.S.)

<sup>2</sup>Department of Biochemistry and Food Chemistry, University of Life Sciences, 8 Skromna Street, 20-704 Lublin, Poland; [urszula.gawlik@up.lublin.pl](mailto:urszula.gawlik@up.lublin.pl); (U.G.-D.)

\*Correspondence: [renata.nowak@umlub.pl](mailto:renata.nowak@umlub.pl) (R.N.); Tel.: +48 81 448 70 62

**Abstract:** The aim of the present study was to investigate the phenolic composition and the biological properties of different *Aerva lanata* (L.) Juss. herb extracts obtained with the use of accelerated solvent extraction (ASE), i.e. a green, ecological method, for cosmetic purposes. All samples exhibited high DPPH• (9.17–119.85 mg TE/g) and ABTS•• (9.90–107.58 mg TE/g) scavenging activity. The extracts exhibited considerable anti-lipoxygenase (EC<sub>50</sub> between 1.14 mg/mL and 3.73 mg/mL) and anti-xanthine oxidase (EC<sub>50</sub> between 1.28 mg/mL and 3.72 mg/mL) activities, moderate chelating activity (EC<sub>50</sub> between 1.58 mg/mL and 5.30 mg/mL), and high antioxidant potential in the ORAC assay (0.36–3.84 mM TE/g). Changes in the polyphenol profile of the analysed samples depending on the solvent and temperature used for the extraction were determined with the liquid chromatography/electrospray mass spectrometry (LC-ESI-MS/MS) method. Twenty-one phenolic compounds, including flavonoids and phenolic acids, were detected and quantified. It was shown that tiliroside was one of the main phenolic metabolites in the *A. lanata* (L.) Juss. herb., which may suggest that this compound may be largely responsible for the observed anti-inflammatory activity of the extracts. Also, the studied extracts exhibited promising skin-related (anti-tyrosinase, anti-elastase, anti-collagenase, and anti-hyaluronidase) activity. This study has shown that *Aerva lanata* (L.) Juss. contains high amounts of phenolic compounds, including tiliroside, and has good skin-related activities. Therefore, the plant may be interesting as a novel source of bioactive agents for cosmetic industries.

**Keywords:** *Aerva* extract; polpala; ASE; LC-ESI-MS/MS; MRM; phenolic compounds; tiliroside; ORAC; cosmetic potential

**Table S1:** Conditions of accelerated solvent extraction

| Sample name  | Type of solvent<br>Ethanol/water | Concentration of ethanol<br>[%] | Temperature [°C] |
|--------------|----------------------------------|---------------------------------|------------------|
| E100 (60°C)  | Ethanol                          | 100                             | 60               |
| E100 (80°C)  | Ethanol                          | 100                             | 80               |
| E100 (100°C) | Ethanol                          | 100                             | 100              |
| E100 (180°C) | Ethanol                          | 100                             | 180              |
| E80 (60°C)   | Ethanol                          | 80                              | 60               |

|             |         |    |     |
|-------------|---------|----|-----|
| E80 (80°C)  | Ethanol | 80 | 80  |
| E80 (100°C) | Ethanol | 80 | 100 |
| E80 (180°C) | Ethanol | 80 | 180 |
| E50 (60°C)  | Ethanol | 50 | 60  |
| E50 (80°C)  | Ethanol | 50 | 80  |
| E50 (100°C) | Ethanol | 50 | 100 |
| E50 (180°C) | Ethanol | 50 | 180 |
| W (60°C)    | Water   | 0  | 60  |
| W (80°C)    | Water   | 0  | 80  |
| W (100°C)   | Water   | 0  | 100 |
| W (180°C)   | Water   | 0  | 180 |

**Table S2:** LC-ESI-MS/MS analytical results of phenolic acids and flavonoids investigated in samples. Compounds were confirmed by comparison with authentic standards

| Compound              | Retention time<br>[min] | [M-H] <sup>-</sup><br>[m/z] | Fragment ions<br>[m/z] | Collision<br>energy [eV] |
|-----------------------|-------------------------|-----------------------------|------------------------|--------------------------|
| Phenolic acids        |                         |                             |                        |                          |
| Gallic acid           | 5.00                    | 168.7                       | 78.9                   | -36                      |
|                       |                         |                             | 124.9                  | -14                      |
| Protocatechuic acid   | 5.85                    | 152.9                       | 80.9                   | -26                      |
|                       |                         |                             | 107.8                  | -38                      |
| Caffeic acid          | 6.70                    | 178.7                       | 88.9                   | -46                      |
|                       |                         |                             | 134.9                  | -16                      |
| Syringic acid         | 7.14                    | 196.9                       | 122.8                  | -24                      |
|                       |                         |                             | 181.9                  | -12                      |
| 4-hydroxybenzoic acid | 7.27                    | 136.8                       | 92.9                   | -18                      |
| Vanillic acid         | 7.46                    | 166.8                       | 107.9                  | -18                      |
|                       |                         |                             | 123                    | -12                      |
| Gentisic acid         | 7.72                    | 352.9                       | 80                     | -110                     |
|                       |                         |                             | 96.9                   | -52                      |
| p-Coumaric acid       | 9.28                    | 162.8                       | 93                     | -44                      |
|                       |                         |                             | 119                    | -14                      |
| Ferulic acid          | 9.84                    | 192.8                       | 133.9                  | -16                      |
|                       |                         |                             | 177.9                  | -12                      |
| Salicylic acid        | 14.16                   | 136.9                       | 75                     | -48                      |
|                       |                         |                             | 93                     | -16                      |
| Flavonoids            |                         |                             |                        |                          |
| Apigenin              | 18.64                   | 268.8                       | 117                    | -44                      |
|                       |                         |                             | 106.8                  | -34                      |
| Prunetin              | 21.98                   | 282.2                       | 267.7                  | -20                      |
|                       |                         |                             | 238.7                  | -16                      |
| Kaempferol            | 18.85                   | 284.7                       | 116.8                  | -46                      |
|                       |                         |                             | 93                     | -52                      |

|              |       |       |       |     |
|--------------|-------|-------|-------|-----|
| Luteolin     | 17.85 | 284.7 | 132.9 | -38 |
|              |       |       | 150.9 | -26 |
| Quercetin    | 17.94 | 300.7 | 150.9 | -26 |
|              |       |       | 178.8 | -20 |
| Rhamnetin    | 20.10 | 314.7 | 165   | -24 |
|              |       |       | 120.9 | -36 |
| Isorhamnetin | 18.99 | 314.7 | 299.7 | -20 |
|              |       |       | 150.9 | -30 |
| Astragalin   | 14.66 | 446.7 | 226.8 | -54 |
|              |       |       | 254.8 | -40 |
| Rutin        | 11.99 | 608.7 | 299.6 | -46 |
|              |       |       | 270.9 | -60 |
| Tiliroside   | 17.39 | 592.8 | 284.8 | -38 |
|              |       |       | 254.7 | -56 |
| Narcissin    | 13.52 | 622.8 | 314.9 | -40 |
|              |       |       | 298.8 | -52 |

**Table S3:**Limits of detection (LOD), limits of quantification (LOQ), and calibration curve parameters for phenolic acids and flavonoids

| Compound                | LOD<br>[ng/mL] | LOQ<br>[ng/mL] | R <sup>2</sup> | Linearity range<br>[ng/mL] |
|-------------------------|----------------|----------------|----------------|----------------------------|
| Phenolic acids          |                |                |                |                            |
| Gallic acid             | 47.5           | 95             | 0.9980         | 190-3300                   |
| Protocatechuic acid     | 17             | 34             | 0.9992         | 68-3470                    |
| Caffeic acid            | 40             | 160            | 0.9990         | 320-3500                   |
| Syringic acid           | 166            | 666            | 0.9985         | 666-11100                  |
| 4-hydroxybenzoic acid   | 17             | 34.7           | 0.9984         | 104.1-3470                 |
| Vanillic acid           | 125            | 250            | 0.9987         | 500-33000                  |
| Gentisic acid           | 1.6            | 3.3            | 0.9991         | 3.3-330                    |
| <i>p</i> -Coumaric acid | 7.3            | 18.1           | 0.9991         | 36.2-1820                  |
| Ferulic acid            | 17.4           | 34.7           | 0.9991         | 69.4-11600                 |
| Salicylic acid          | 8.3            | 16.5           | 0.9985         | 16.5-1650                  |
| Flavonoids              |                |                |                |                            |
| Apigenin                | 15             | 30             | 0.9979         | 89-4470                    |

|              |       |       |        |            |
|--------------|-------|-------|--------|------------|
| Prunetin     | 10    | 20    | 0.9983 | 150-20000  |
| Kaempferol   | 33    | 66    | 0.9987 | 89-4470    |
| Luteolin     | 5     | 15    | 0.9982 | 330-1500   |
| Quercetin    | 66    | 120   | 0.9987 | 120-6600   |
| Rhamnetin    | 120   | 240   | 0.9988 | 240-4400   |
| Isorhamnetin | 300   | 500   | 0.9991 | 1000-5000  |
| Astragalin   | 100.0 | 200.0 | 0.9978 | 1200-24000 |
| Rutin        | 120.0 | 300.0 | 0.9985 | 2000-25000 |
| Tiliroside   | 100   | 250   | 0.9981 | 1000-25000 |
| Narcissin    | 50    | 100   | 0.9983 | 200-25000  |
